# Supplementary material for: Investigation of Radiation Effect on Structural and Optical Properties of GaAs under High-Energy Electron Irradiation
Source: Materials (Basel). 2022 Aug 26;15(17):5897. doi: 10.3390/ma15175897 (PMC9457441; doi:10.3390/ma15175897)
Supplement: Supplementary file 1 [file materials-15-05897-s001.zip › materials-1872619-supplementary.pdf]

**Authit Phakkhawan <sup>1</sup>, Aparporn Sakulkalavek <sup>1</sup>, Siritorn Buranurak <sup>2</sup>, Pawinee Klangtakai <sup>2,3,4,\*</sup>,  
Karnwalee Pangza <sup>5</sup>, Nongnuch Jangsawang <sup>5</sup>, Sawinee Nasompag <sup>6</sup>, Mati Horprathum <sup>7</sup>, Suphakan  
Kijamnajsuk <sup>8</sup> and Sakuntam Sanorpim <sup>9</sup>**

<sup>1</sup> Department of Physics, Faculty of Science, King Mongkut's Institute of Technology  
Ladkrabang, Bangkok 10520, Thailand

<sup>2</sup> Department of Physics, Faculty of Science, Khon Kaen University,  
Khon Kaen 40002, Thailand

<sup>3</sup> Institute of Nanomaterials Research and Innovation for Energy (IN-RIE), Khon Kaen  
University, Khon Kaen 40002, Thailand

<sup>4</sup> Thailand Center of Excellence in Physics, Chiang Mai University, P.O. Box 70,  
Chiang Mai 50202, Thailand

<sup>5</sup> Gems Irradiation Center, Thailand Institute of Nuclear Technology,  
Nakhon-Nayok 26120, Thailand

<sup>6</sup> Research Instrument Center, Khon Kaen University, Khon Kaen 40002, Thailand

<sup>7</sup> National Electronics and Computer Technology Center (NECTEC), National Science and  
Technology Development Agency (NSTDA), Khlong Luang 12120, Thailand

<sup>8</sup> National Metal and Materials Technology Center (MTEC), National Science and Technology  
Development Agency (NSTDA), Khlong Luang 12120, Thailand; suphakk@mtec.or.th

<sup>9</sup> Department of Physics, Faculty of Science, Chulalongkorn University, Phayathai Rd.,  
Patumwan, Bangkok 10330, Thailand

\* Correspondence: pawinee@kku.ac.th

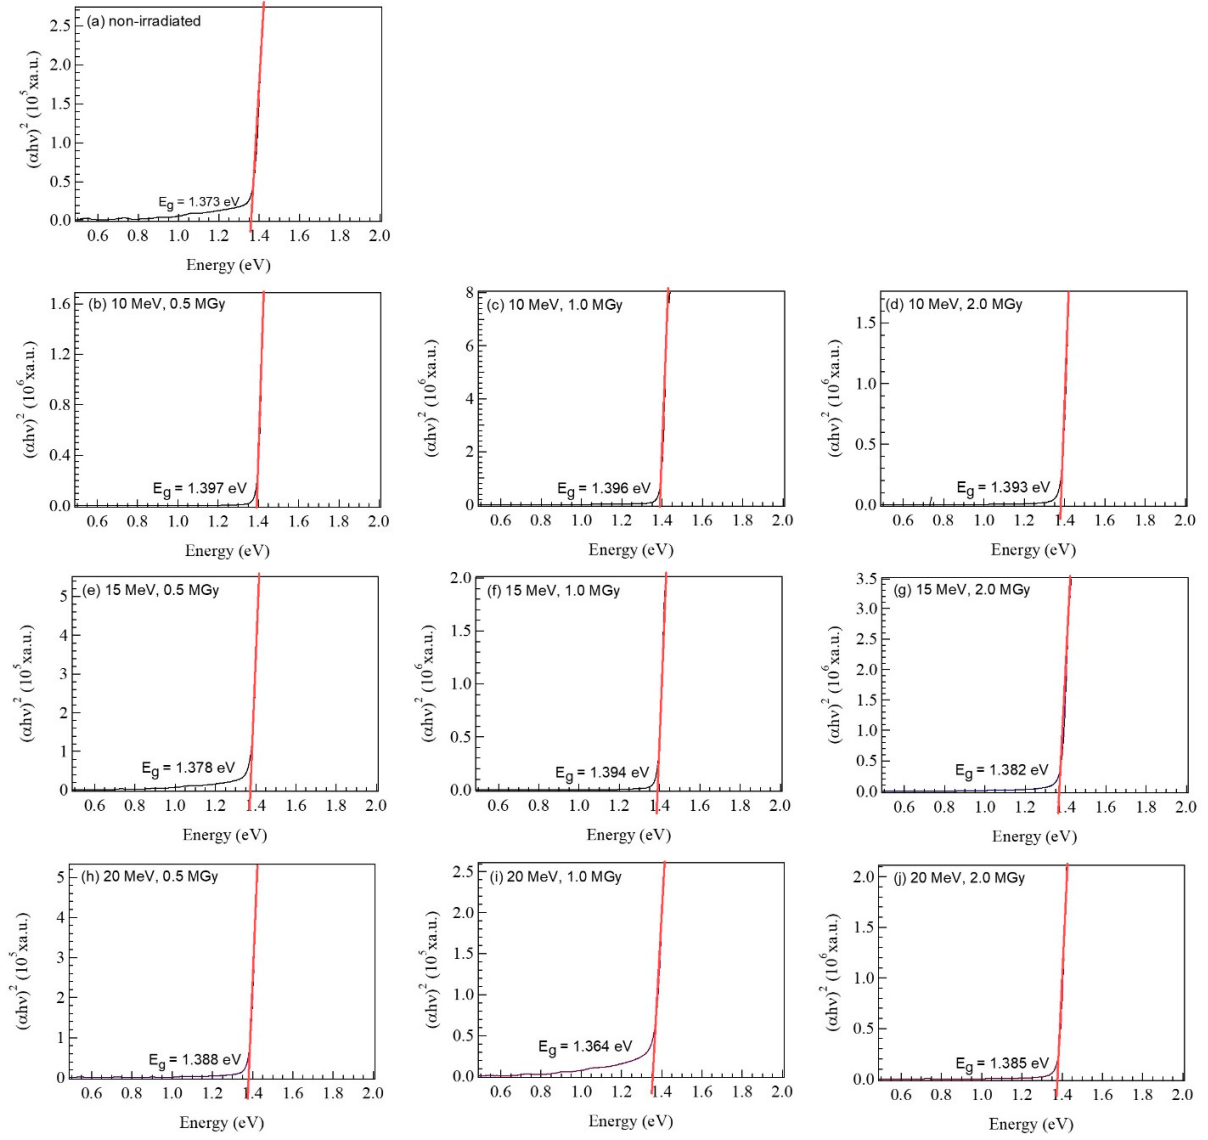

**Figure S1** Tauc plot of  $(\alpha h\nu)^2$  vs. photon energy  $(h\nu)$  of (a) the non-irradiated and (b-j) the irradiated GaAs samples with electron energies of 10, 15, and 20 MeV at electron doses of 0.5, 1.0, and 2.0 MGy.

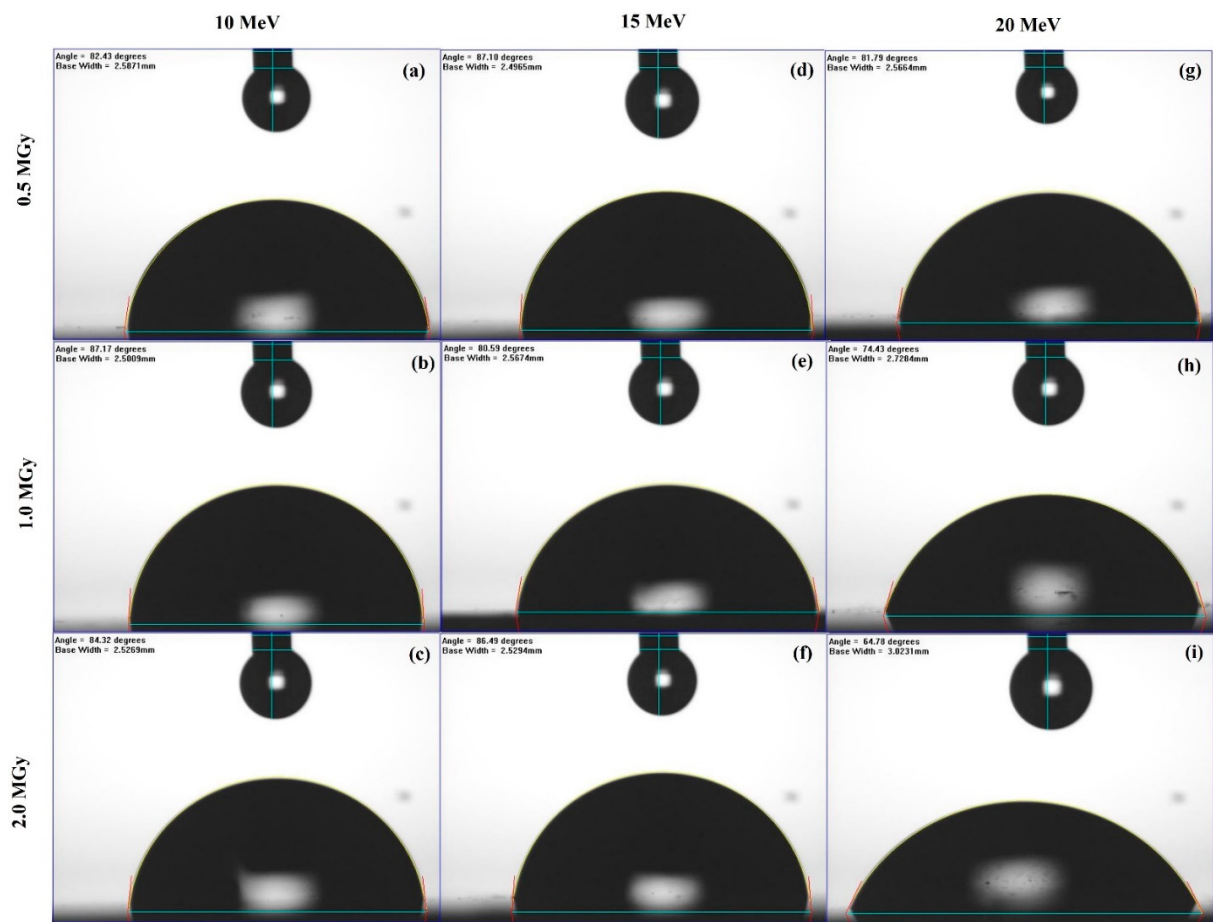

**Figure S2** Contact angle measurement of the irradiated GaAs samples with electron energies of 10 (a-c), 15 (d-f), and 20 (g-i) MeV at electron doses of 0.5, 1.0, and 2.0 MGy, respectively.
